# Supplementary material for: Taxonomic and functional diversity of benthic macrofauna associated with rhodolith beds in SE Brazil
Source: PeerJ. 2021 Jul 29;9:e11903. doi: 10.7717/peerj.11903 (PMC8325915; doi:10.7717/peerj.11903)
Supplement: Supplemental Information 1 — The presence/absence of benthic organisms in each sample, and the statistical results not included in the main text. [file peerj-09-11903-s001.xlsx]

## Sheet: Rhodolith
Habitat	Density	Station	Density of beds (n/mˆ2)	Total intern volume (ml/mˆ3)	Morf-Compact (%)	Morf-Compact-Platy (%)	Morf-Compact-Bladed (%)	Morf-Compact-Elongate (%)	Morf-Platy (%)	Morf-Bladed (%)	Morf-Elongate (%)	Morf-Very-Platy (%)	Morf-Very-Bladed (%)	Morf-Very-Elongate (%)	Ramif-I (%)	Ramif-II (%)	Ramif-III (%)	Ramif-IV (%)	Diameter (cm)	Depth (m)
RBs	High	H1	50	160	26	10	8	18	12	12	10	0	4	0	0.0181818	0.181818	0.181818	0.618182	2.89033	38.56
RBs	High	H1	53	30	13.2075	9.43396	3.77358	7.54717	9.43396	28.3019	9.43396	3.77358	7.54717	7.54717	0.0454545	0.136364	0.181818	0.636364	2.75597	38.56
RBs	High	H1	68	270	25.7576	6.06061	10.6061	13.6364	6.06061	12.1212	13.6364	3.0303	7.57576	1.51515	0.0869565	0.0217391	0.173913	0.717391	2.79889	38.56
RBs	High	H2	74	415	40.9091	4.54545	15.1515	24.2424	6.06061	1.51515	7.57576	0	0	0	0	0	0	1	3.99955	54.82
RBs	High	H2	66	310	44.5946	6.75676	13.5135	18.9189	1.35135	6.75676	6.75676	0	1.35135	0	0	0	0	1	3.79329	54.82
RBs	High	H2	66	315	44.5946	12.1622	17.5676	8.10811	6.75676	5.40541	4.05405	0	1.35135	0	0.121951	0	0	0.97561	4.01599	54.82
RBs	High	H3	68	415	26.087	5.7971	15.942	17.3913	5.7971	18.8406	7.24638	1.44928	1.44928	0	0	0.04	0	0.96	3.72899	50.88
RBs	High	H3	53	270	35.0877	12.2807	14.0351	14.0351	0	17.5439	7.01754	0	0	0	0.0277778	0	0	0.972222	3.92515	50.88
RBs	High	H3	115	625	41.8803	8.54701	17.094	10.2564	5.12821	6.83761	6.83761	1.7094	0.854701	0.854701	0.0672269	0.0252101	0	0.907563	3.67607	50.88
RBs	Low	L1	41	305	14.6341	0	17.0732	17.0732	4.87805	31.7073	7.31707	2.43902	4.87805	0	0	0	0	1	3.58862	47.41
RBs	Low	L1	28	205	16.6667	25	25	16.6667	8.33333	8.33333	0	0	0	0	0	0	0	1	4.45	47.41
RBs	Low	L1	35	230	8.57143	17.1429	5.71429	14.2857	17.1429	22.8571	11.4286	0	2.85714	0	0.0285714	0.0285714	0	0.942857	3.80952	47.41
RBs	Low	L2	33	625	12.1212	18.1818	12.1212	15.1515	6.06061	15.1515	18.1818	0	3.0303	0	0	0	0.0909091	0.909091	5.11061	39.69
RBs	Low	L2	18	180	16.6667	11.1111	16.6667	0	16.6667	16.6667	11.1111	0	5.55556	5.55556	0.0555556	0.0555556	0.166667	0.722222	5.71111	39.69
RBs	Low	L2	17	300	5.88235	5.88235	23.5294	23.5294	11.7647	23.5294	5.88235	0	0	0	0	0	0.210526	0.789474	5.3402	39.69
RBs	Low	L3	3	33	0	0	0	0	0	33.33	33.33	33.33	0	0	0	0	0.03	0.97	4.2	45.66
RBs	Low	L3	5	61	20	0	0	20	0	40	20	0	0	0	0	0.02	0	0.98	3.53667	45.66
RBs	Low	L3	3	59	33.33	33.33	0	33.33	0	0	0	0	0	0	0	0	0	1	4.23333	45.66

## Sheet: Sediment
Habitat	Density	Station	TOM %	Gravel %	Sand %	Silt %	Carbonate %	Depth (m)	Protein (mg g-1)	Carbohydrate (mg g-1)	Lipid (mg g-1)	Ratio protein/carb	Ratio carb/lipid
Sediment	High	H1	2.76725	16.04	81.85	2.107	5.7115	38.56	0.857659	0.304924	0.189387	2.81269	1.61006
Sediment	High	H1	3.22933	22.98	75.7	1.314	5.70462	38.56	0.743847	0.583218	0.178747	1.27542	3.2628
Sediment	High	H1	2.63657	46.27	52.63	1.1	4.89601	38.56	0.566319	0.731261	0.300614	0.774441	2.43256
Sediment	High	H2	3.5824	27.42	70.57	2.004	4.7983	54.82	0.435837	1.49507	0.254357	0.291517	5.87782
Sediment	High	H2	3.32842	24.12	72.71	3.169	5.09915	54.82	0.464985	0.695702	0.28368	0.668368	2.45242
Sediment	High	H2	3.43656	7.005	90.95	2.045	5.08408	54.82	0.800647	2.41854	0.173059	0.331046	13.9752
Sediment	High	H3	4.40801	23.64	74.72	1.644	6.55488	50.88	0.780071	1.6547	0.241304	0.471427	6.85734
Sediment	High	H3	5.52744	25.7	73	1.304	7.56077	50.88	0.520139	1.5114	0.103404	0.344145	14.6165
Sediment	High	H3	4.1248	9.973	88.18	1.847	7.57492	50.88	-	-	-	-	-
Sediment	Low	L1	2.52101	8.017	90.71	1.277	3.56477	47.41	0.270321	0.761822	0.0205058	0.354835	37.1516
Sediment	Low	L1	2.98593	4.812	93.67	1.514	4.54813	47.41	0.258339	0.911553	0.00818355	0.283405	111.388
Sediment	Low	L1	3.05061	8.203	89.77	2.031	3.79023	47.41	0.300758	1.05909	0.0243831	0.283977	43.4356
Sediment	Low	L2	4.51015	18.14	80.05	1.802	5.64156	39.69	0.302466	1.25259	0.149485	0.241472	8.37939
Sediment	Low	L2	3.99103	17.12	80.64	2.24	4.81084	39.69	0.278245	0.753839	0.248978	0.369104	3.02773
Sediment	Low	L2	4.42926	20.58	78.17	1.244	5.37606	39.69	0.297276	1.28244	0.220129	0.231804	5.82587
Sediment	Low	L3	-	-	-	-	-	45.66	-	-	-	-	-
Sediment	Low	L3	-	-	-	-	-	45.66	-	-	-	-	-
Sediment	Low	L3	-	-	-	-	-	45.66	-	-	-	-	-

## Sheet: Macrofaunal density_H_J
Habitats	Density	Station	Macrofaunal density (ind/m-2)	H'	J'
RBs	High	H1	2208	3.52	0.812
RBs	High	H1	2828	3.438	0.778
RBs	High	H1	2336	3.156	0.748
RBs	High	H2	2844	3.052	0.704
RBs	High	H2	3336	3.097	0.708
RBs	High	H2	2528	3.546	0.823
RBs	High	H3	2392	3.071	0.722
RBs	High	H3	2500	2.774	0.686
RBs	High	H3	3656	3.197	0.74
RBs	Low	L1	4744	2.11	0.503
RBs	Low	L1	1420	2.392	0.667
RBs	Low	L1	3720	1.948	0.493
RBs	Low	L2	4608	2.301	0.534
RBs	Low	L2	2728	3.023	0.675
RBs	Low	L2	1560	3.048	0.722
RBs	Low	L3	464	2.122	0.63
RBs	Low	L3	680	1.364	0.472
RBs	Low	L3	1132	1.653	0.491
Sediment	High	H1	96	1.42	0.729
Sediment	High	H1	152	1.384	0.668
Sediment	High	H1	60	1.986	0.904
Sediment	High	H2	104	1.956	0.816
Sediment	High	H2	256	2.546	0.864
Sediment	High	H2	92	1.212	0.747
Sediment	High	H3	200	2.373	0.796
Sediment	High	H3	68	1.006	0.725
Sediment	High	H3	68	1.315	0.734
Sediment	Low	L1	100	1.697	0.737
Sediment	Low	L1	28	1.475	0.916
Sediment	Low	L1	92	2.223	0.894
Sediment	Low	L2	84	2.491	0.944
Sediment	Low	L2	224	1.661	0.599
Sediment	Low	L2	28	1.153	0.832
Sediment	Low	L3	228	2.221	0.768
Sediment	Low	L3	696	3.229	0.894
Sediment	Low	L3	420	2.541	0.789

## Sheet: Functional_metrics
Habitat	Density	Station	FRic	FEve	FDis	FRaoQ
RBs	High	H1	8	0.0794107	0.274517	0.0846031
RBs	High	H1	8	0.0742114	0.270143	0.0831087
RBs	High	H1	7	0.0710441	0.245267	0.0741056
RBs	High	H2	7	0.0662692	0.233528	0.0700732
RBs	High	H2	7	0.057646	0.233929	0.0697264
RBs	High	H2	8	0.0848277	0.285609	0.0884044
RBs	High	H3	8	0.081348	0.257669	0.0782705
RBs	High	H3	6	0.0681594	0.192554	0.0561453
RBs	High	H3	8	0.0757427	0.254634	0.076882
RBs	Low	L1	7	0.0757236	0.159104	0.0461338
RBs	Low	L1	6	0.112391	0.213509	0.0624979
RBs	Low	L1	6	0.0747217	0.148589	0.0427379
RBs	Low	L2	8	0.0753244	0.155808	0.0450414
RBs	Low	L2	8	0.0707403	0.225871	0.0680498
RBs	Low	L2	7	0.0793651	0.242584	0.0735757
RBs	Low	L3	6	0.152066	0.20619	0.0603455
RBs	Low	L3	6	0.250605	0.101566	0.0287207
RBs	Low	L3	6	0.117654	0.174197	0.0493973
Sediment	High	H1	4	0.4	0.204257	0.0577257
Sediment	High	H1	6	0.274725	0.174639	0.0496884
Sediment	High	H1	5	0.428571	0.296259	0.09
Sediment	High	H2	5	0.318099	0.243818	0.0721154
Sediment	High	H2	6	0.235294	0.289658	0.0859375
Sediment	High	H2	4	0.370968	0.254159	0.0694707
Sediment	High	H3	7	0.261547	0.285769	0.0851728
Sediment	High	H3	3	0.5	0.176793	0.0475778
Sediment	High	H3	4	0.495536	0.253343	0.0743945
Sediment	Low	L1	4	0.213816	0.261165	0.0756
Sediment	Low	L1	3	0.333333	0.255507	0.0714286
Sediment	Low	L1	5	0.333333	0.308556	0.0960744
Sediment	Low	L2	6	0.363636	0.311659	0.098125
Sediment	Low	L2	6	0.231995	0.217006	0.0642538
Sediment	Low	L2	3	0.5	0.201998	0.0561224
Sediment	Low	L3	6	0.215485	0.287511	0.0885657
Sediment	Low	L3	7	0.142857	0.311484	0.0987664
Sediment	Low	L3	7	0.202119	0.305572	0.0944898

## Sheet: Table_macrofauna
Habitat	Density	Station	N id sp1	N id sp2	N id sp3	N id sp4	N id sp6	N id sp7	Syllidae	Nereididae	Oweniidae	Cirratulidae	Orbinidae	Flabelligeridae	Nephytidae	Mangelonidae	Capitellidae	Paraonidae	Onuphidae	Iospilidae	Dorvilleidae	Ampharetidae	Sternaspidae	Aphroditidae	Hesionidae	Maldane sp	Lysidice sp	Eunice sp	Palolo sp	Marphysa sp	Megalomma sp	Hydroides sp	Pseudovermilia sp	Vermiliopsis sp	Anaitides sp	Phyllodoce sp1	Phyllodoce sp2	Pectinaria sp	Arabella sp	Oenone sp	Lumbrineris sp	Notopygos sp	Glycera multidens	Glycera lapidum	Goniadides sp	Hemipodia californiensis	Glycera sp	Hemipodia sp	Harmothoe sp
RBs	High	H1	10	2	3	2	0	8	107	36	0	0	0	1	0	1	5	4	0	0	6	0	0	1	3	1	22	4	0	0	18	0	15	6	7	2	3	0	0	0	1	3	0	0	0	0	0	0	7
RBs	High	H1	12	0	3	2	1	2	138	23	0	0	0	0	0	0	0	1	0	1	1	1	1	0	1	1	22	6	1	0	15	2	17	2	4	13	1	0	2	1	5	9	0	1	5	0	0	1	3
RBs	High	H1	8	0	4	0	0	20	147	6	0	0	0	0	0	0	0	0	1	0	7	0	1	1	3	0	11	0	1	1	7	0	32	1	5	13	1	0	2	0	0	4	0	0	1	0	0	0	13
RBs	High	H2	7	0	3	0	0	0	81	38	0	2	1	0	1	0	3	7	7	0	1	0	2	1	0	1	26	3	0	0	10	0	13	3	4	2	0	0	2	0	3	6	0	1	1	1	1	0	14
RBs	High	H2	4	0	4	2	0	1	260	39	1	1	0	1	1	1	2	5	2	0	5	0	0	1	0	0	17	5	0	0	4	2	14	4	6	9	2	0	0	0	4	16	0	7	2	0	4	2	13
RBs	High	H2	14	0	6	1	0	0	104	22	0	1	1	1	0	0	2	6	0	0	3	0	0	0	4	1	14	3	1	2	7	2	10	2	2	2	3	0	9	2	5	26	0	0	3	0	3	0	15
RBs	High	H3	20	0	2	0	0	1	147	14	0	0	0	0	0	0	1	4	5	0	1	0	0	0	1	2	17	1	0	0	20	3	2	3	6	7	0	1	0	0	6	5	1	0	1	0	0	0	6
RBs	High	H3	39	0	1	0	0	0	137	8	0	2	0	1	0	0	3	6	9	0	2	0	0	0	0	0	13	4	0	0	13	0	9	6	4	7	0	0	0	0	1	3	0	0	0	0	2	0	9
RBs	High	H3	31	0	3	0	0	0	196	28	0	1	0	0	0	0	1	2	0	0	1	1	0	1	0	0	16	10	1	2	46	0	28	0	8	2	0	0	0	0	6	1	0	0	4	0	0	0	18
RBs	Low	L1	6	0	1	0	0	4	96	26	0	1	0	0	0	0	0	0	17	0	0	0	0	2	0	0	32	7	2	0	26	2	9	1	9	3	2	0	0	0	5	2	0	0	1	0	0	0	20
RBs	Low	L1	0	0	0	0	0	1	33	6	0	0	0	0	1	0	0	0	12	0	0	0	0	0	1	0	21	4	3	0	6	1	3	1	0	0	0	0	0	0	0	1	0	0	0	2	0	0	5
RBs	Low	L1	8	0	5	0	0	0	113	2	0	3	0	0	0	0	1	2	10	0	0	0	0	2	0	2	31	1	1	0	4	0	5	0	1	2	0	0	0	0	1	3	0	0	0	0	0	0	8
RBs	Low	L2	6	0	0	0	0	0	197	26	0	2	4	4	1	0	2	3	0	0	2	0	1	1	0	0	24	5	13	0	14	0	4	0	2	4	1	0	0	0	2	0	0	0	1	0	0	0	23
RBs	Low	L2	4	0	1	0	0	4	93	17	1	4	3	0	0	0	3	16	2	0	1	1	0	1	0	0	11	3	2	0	10	0	4	0	2	3	2	1	1	2	1	4	0	0	0	0	1	0	16
RBs	Low	L2	2	0	0	0	4	0	22	12	0	1	0	0	0	2	0	9	0	0	3	0	0	0	3	0	5	4	1	0	1	0	1	1	1	3	0	0	2	0	0	0	0	0	2	0	0	0	10
RBs	Low	L3	1	0	0	0	1	0	22	0	2	1	0	0	0	0	1	3	0	0	1	0	0	0	0	0	1	1	0	0	1	0	1	1	0	0	0	0	2	0	0	0	0	0	0	0	0	0	0
RBs	Low	L3	2	0	0	0	0	0	16	0	0	0	0	0	0	0	1	3	0	1	0	0	0	0	0	0	3	0	1	0	0	0	3	0	0	0	0	0	0	0	0	0	0	0	0	0	0	0	0
RBs	Low	L3	2	0	0	0	1	0	35	1	1	0	0	0	0	0	0	5	0	0	1	0	0	0	0	0	0	1	0	0	1	0	1	0	0	0	0	1	2	0	0	1	0	0	0	0	0	0	0
Sediment	High	H1	0	0	0	0	0	0	0	0	0	1	0	0	0	0	0	0	0	0	0	0	0	0	0	0	0	0	0	0	0	0	0	0	0	0	0	0	0	0	0	0	0	0	0	0	0	0	0
Sediment	High	H1	0	0	0	0	0	0	0	0	0	0	1	0	0	0	0	0	0	0	0	0	0	0	0	0	0	0	0	0	0	0	0	0	0	0	0	0	0	0	0	0	0	0	0	0	0	0	0
Sediment	High	H1	0	0	0	0	0	0	1	0	0	0	0	0	0	0	0	0	0	0	0	0	0	0	0	0	0	0	0	0	0	0	0	0	0	0	0	0	0	0	0	0	0	0	0	0	0	0	0
Sediment	High	H2	0	0	0	0	0	0	3	0	0	0	0	0	0	0	0	0	0	0	0	0	0	0	0	0	0	0	0	0	0	0	0	0	0	0	0	0	0	0	0	0	0	0	0	0	0	0	0
Sediment	High	H2	0	0	0	0	0	0	10	3	0	0	0	1	0	0	0	0	0	0	0	0	0	0	0	0	0	0	0	0	0	0	0	0	0	0	0	0	0	0	0	1	0	0	0	0	1	0	0
Sediment	High	H2	0	0	0	0	0	0	1	0	0	0	0	0	0	0	0	0	0	0	0	0	0	0	0	0	0	1	0	0	0	0	0	0	0	0	0	0	0	0	0	0	0	0	0	0	0	0	0
Sediment	High	H3	0	0	0	0	0	0	3	0	0	0	1	0	0	0	0	0	0	1	1	0	0	0	0	0	0	0	0	0	0	0	1	0	0	0	0	0	0	0	1	0	0	0	0	0	1	0	1
Sediment	High	H3	0	0	0	0	0	0	0	0	0	0	0	0	0	0	0	0	0	0	0	0	0	0	0	0	0	0	0	0	0	0	0	0	0	0	0	0	0	0	0	0	0	0	0	0	0	0	0
Sediment	High	H3	0	0	0	0	0	0	2	0	0	0	0	0	0	0	0	0	0	0	0	0	0	0	0	0	0	0	0	0	0	0	0	0	0	0	0	0	0	0	0	0	0	0	0	0	0	0	0
Sediment	Low	L1	0	0	0	0	0	0	2	1	0	0	0	0	0	0	0	0	0	0	0	0	0	0	0	0	0	0	0	0	0	0	0	0	0	0	0	0	0	0	0	0	0	0	0	0	0	0	0
Sediment	Low	L1	0	0	0	0	0	0	1	0	1	0	0	0	0	0	1	0	0	0	0	0	0	0	0	0	0	0	0	0	0	0	0	0	0	0	0	0	0	0	0	0	0	0	0	0	1	0	0
Sediment	Low	L1	0	0	0	0	0	0	1	0	0	0	0	0	0	0	0	0	0	0	0	0	0	0	0	0	0	0	0	0	0	0	0	0	0	0	0	0	0	0	0	0	0	0	0	0	1	0	0
Sediment	Low	L2	0	0	0	0	0	0	0	1	0	0	0	0	0	0	1	0	0	0	0	0	0	0	0	0	0	0	0	0	0	0	0	0	0	0	0	0	0	0	0	0	0	0	0	0	1	0	1
Sediment	Low	L2	0	0	0	0	0	0	0	0	0	0	0	0	0	0	0	0	0	0	0	0	0	0	0	0	0	0	0	0	0	0	0	0	0	0	0	0	0	0	0	0	0	0	0	0	0	0	0
Sediment	Low	L2	0	0	0	0	0	0	0	0	0	0	0	0	0	0	0	0	0	0	0	0	0	0	0	0	0	0	0	0	0	0	0	0	0	0	0	0	0	0	0	0	0	0	0	0	0	0	0
Sediment	Low	L3	0	0	0	0	0	0	3	2	1	0	0	0	0	0	0	0	0	0	0	0	0	0	0	0	0	1	0	0	0	0	2	0	0	1	0	0	0	0	0	1	0	0	0	0	1	0	0
Sediment	Low	L3	0	0	0	0	0	0	20	5	6	5	2	0	0	0	8	0	0	0	1	0	0	0	0	0	0	1	0	0	0	0	0	0	0	3	0	0	1	0	1	0	0	0	9	0	0	0	2
Sediment	Low	L3	0	0	0	0	0	0	13	4	0	2	0	0	0	0	1	0	0	0	0	0	0	0	0	0	0	0	0	0	0	0	1	0	0	1	0	0	0	0	0	0	0	0	5	0	0	0	0
[truncated: 104 more columns]
